# Supplementary material for: Tetrametallic lanthanide(iii) phosphonate cages: synthetic, structural and magnetic studies
Source: Royal Society of Chemistry journal article supplement (doi:10.1039/c4dt02630f), 2014-01-01
Supplement: c4dt02630f1.pdf [file c4dt02630f1.pdf]

## Tetrametallic lanthanide(III) phosphonate cages: synthetic, structural and magnetic studies

Karzan H. Zangana, Eufemio Moreno Pineda and Richard E. P. Winpenny\*

*School of Chemistry and Photon Science Institute, The University of Manchester, Oxford Road, Manchester M13 9PL, UK.*

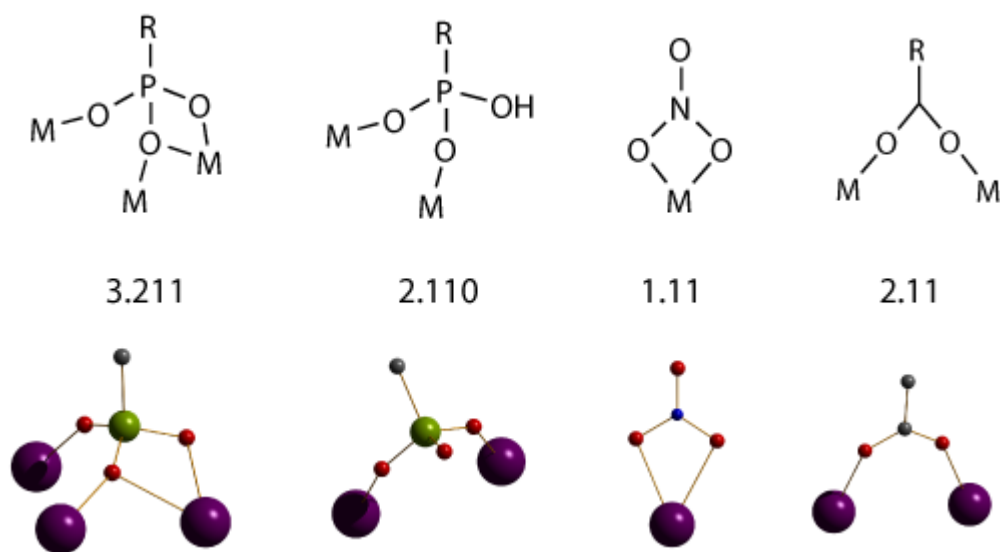

**Figure S1.** Scheme for binding modes by Harris notation of the phosphonates, nitrates and acetates in the clusters 1–5. Scheme: La, purple; P, light green; O, red; C, grey; N, cyan; H omitted for clarity.

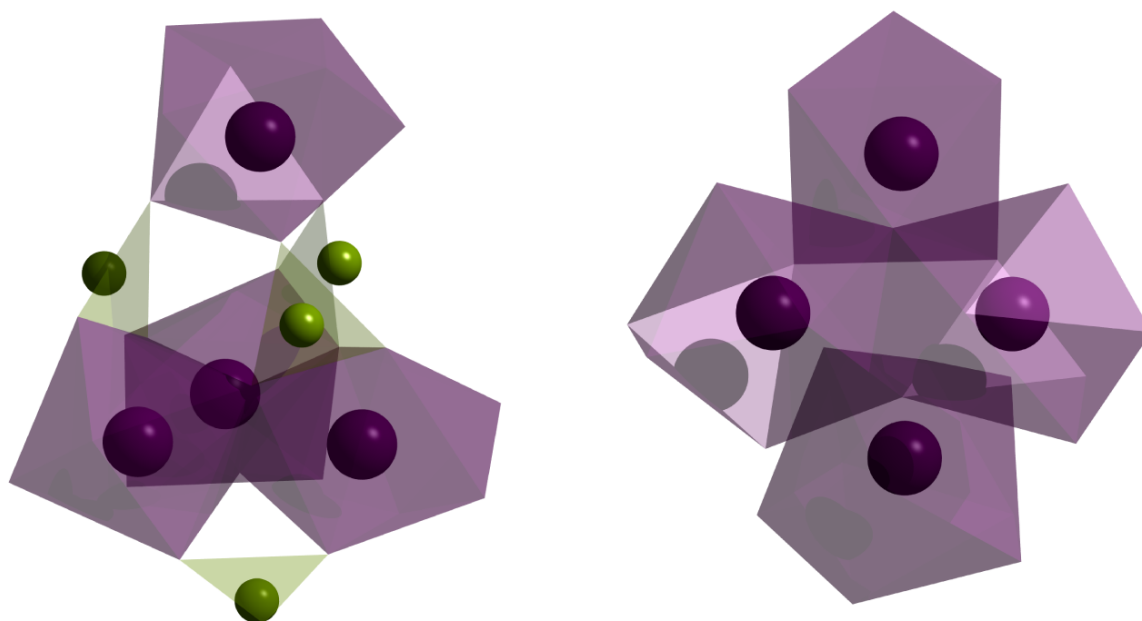

**Figure S2.** Left; Polyhedral view of  $\{Ln_4P_4\}$  core. Right; Polyhedral view of metal core of the clusters 1–5.

**Table S3.** Selected bond distances and angles of **1–5**.

|                             | <b>1</b>  | <b>2</b>    | <b>3</b>     | <b>4</b>    | <b>5</b>     |
|-----------------------------|-----------|-------------|--------------|-------------|--------------|
| Ln1...Ln2                   | 3.8642(6) | 3.86034(6)  | 3.83996(9)   | 3.81835(2)  | 3.79389(5)   |
| Ln2...Ln3                   | 3.8104(6) | 3.81040(5)  | 3.78803(8)   | 3.77887(3)  | 3.74962(5)   |
| Ln1...Ln3                   | 3.8151(8) | 3.81543(7)  | 3.79302(10)  | 3.77498(4)  | 3.75378(7)   |
| Ln1...O1...Ln2 <sup>°</sup> | 109.1(2)  | 108.9690(1) | 109.1750(15) | 109.0140(3) | 109.4290(1)  |
| Ln2...O1...Ln3 <sup>°</sup> | 108.8(3)  | 108.3313(5) | 107.9582(8)  | 108.6251(2) | 108.6518(6)  |
| Ln1...O1...Ln3 <sup>°</sup> | 108.9(2)  | 108.8080(1) | 108.700(2)   | 108.1132(4) | 108.9010(13) |

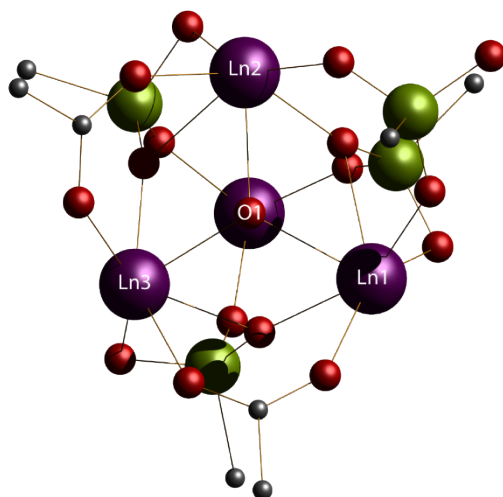

**Figure S3.** {Ln<sub>3</sub>} moiety for Ln<sub>4</sub>P<sub>4</sub> clusters. Scheme: La, purple; P, light green; O, red; C, grey; H omitted for clarity.
